# Supplementary material for: Uterine B Cells Exhibit Regulatory Properties During the Peri-Implantation Stage of Murine Pregnancy
Source: PubMed Central journal article supplement (PMC6917594; doi:10.3389/fimmu.2019.02899), 2019-12-11
Supplement: Data_Sheet_1.pdf [file Data_Sheet_1.pdf]

*Supplementary Material*

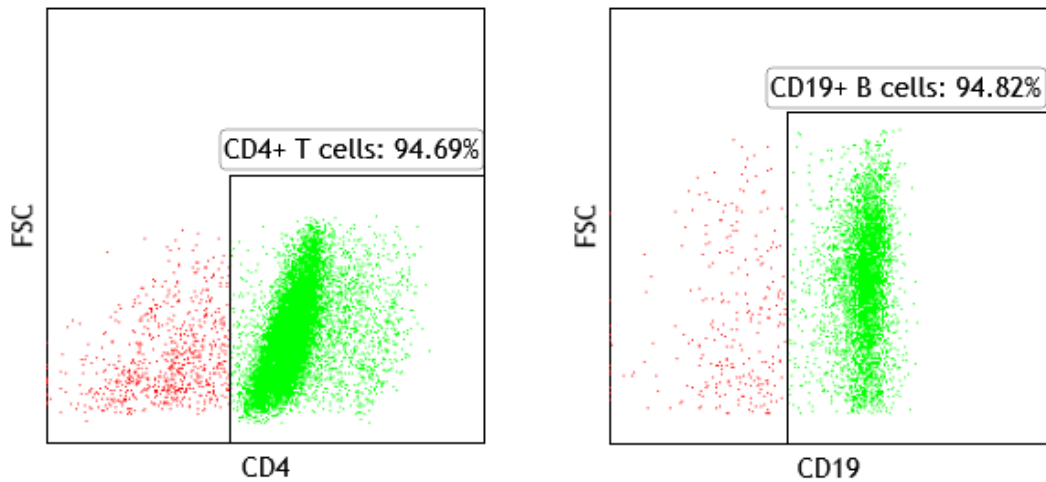

**Supplementary Figure 1.** Flow cytometric assessment of CD4<sup>+</sup> T cell and B cell purification methods. CD4<sup>+</sup> T cells were purified from female C57Bl/6J splenocyte single cell suspensions by negative selection via magnetic isolation. Similarly, B cells were purified from single cell preparations of spleen and the para-aortic (uterine draining) lymph nodes by negative selection while B cells from uterine tissue were purified by FACS sorting. Assessment of resultant CD4<sup>+</sup> T cell and B cell purity was performed by staining samples of purified cell preparations with anti-CD4 or anti-CD19 antibodies respectively, followed by flow cytometric analysis. Shown are representative dot plots which indicate that each purification technique resulted in >90% purity.

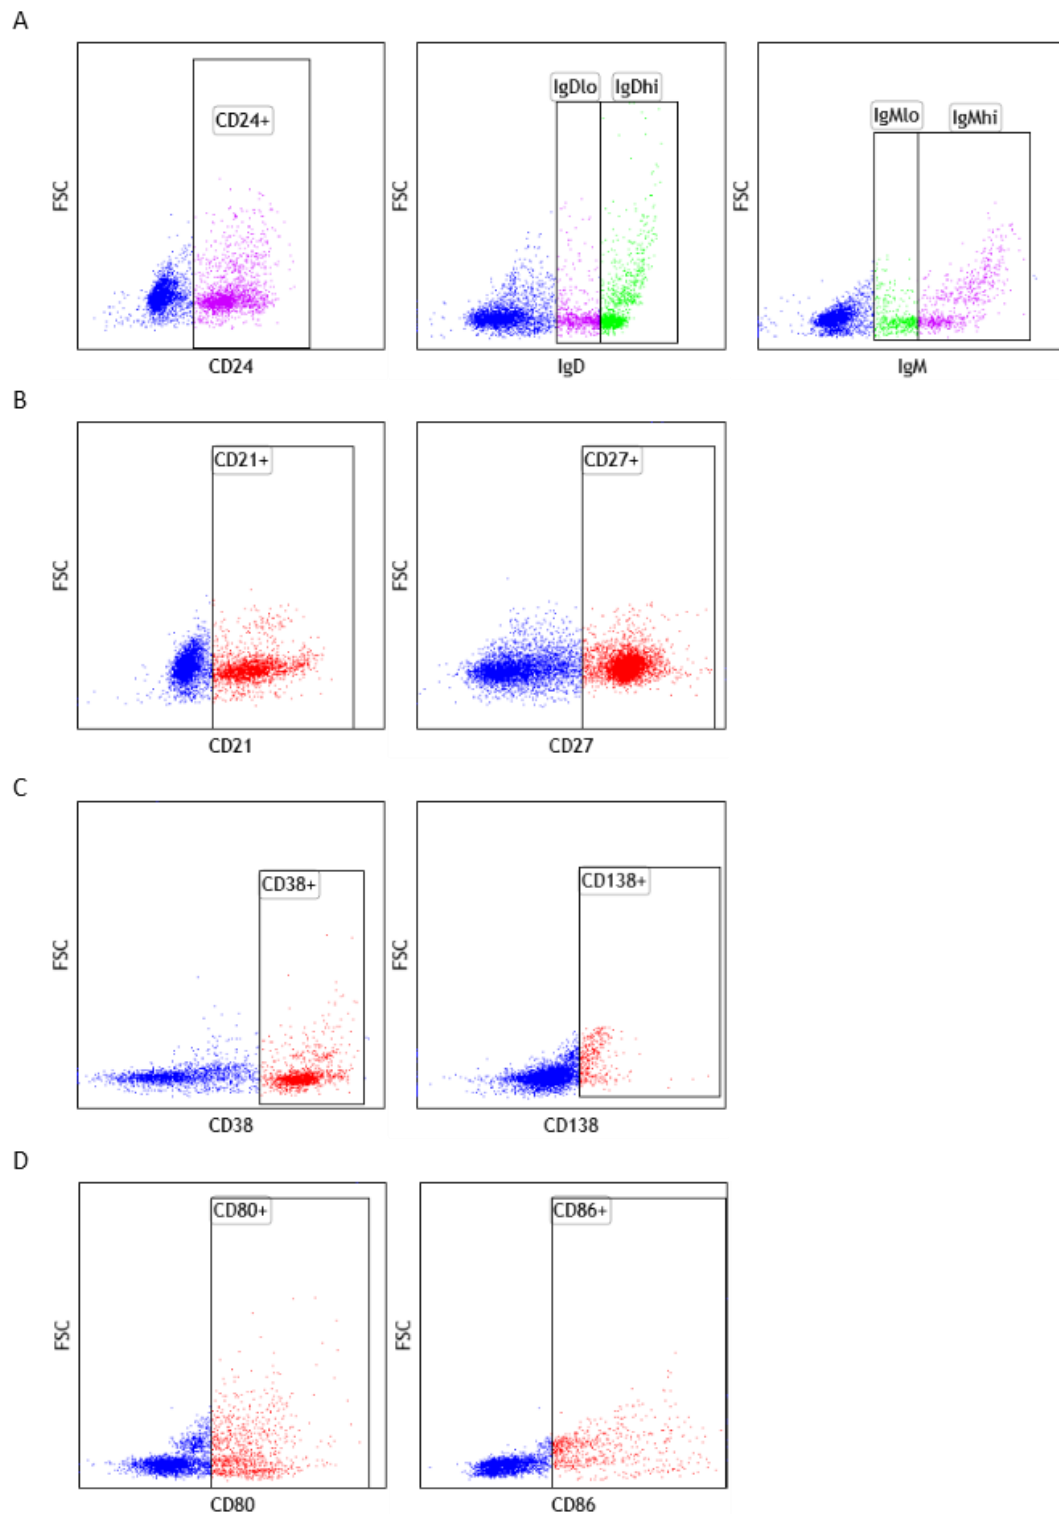

**Supplementary Figure 2.** Single color controls for establishing the gating strategies of various B cell populations. Single staining was used to determine the fluorescence parameters of populations positive or negative for surface marker expression. Parameters were applied to  $CD19^+B220^+$  B cells for the identification of the following groups: (A)  $CD24^+IgM^{hi}IgD^{lo}$  transitional B cells; (B)  $CD21^+CD27^+$  memory B cells;  $CD27^+CD38^+CD138^+$  plasma cells; (D)  $CD80^+CD86^+$  activated B cells.

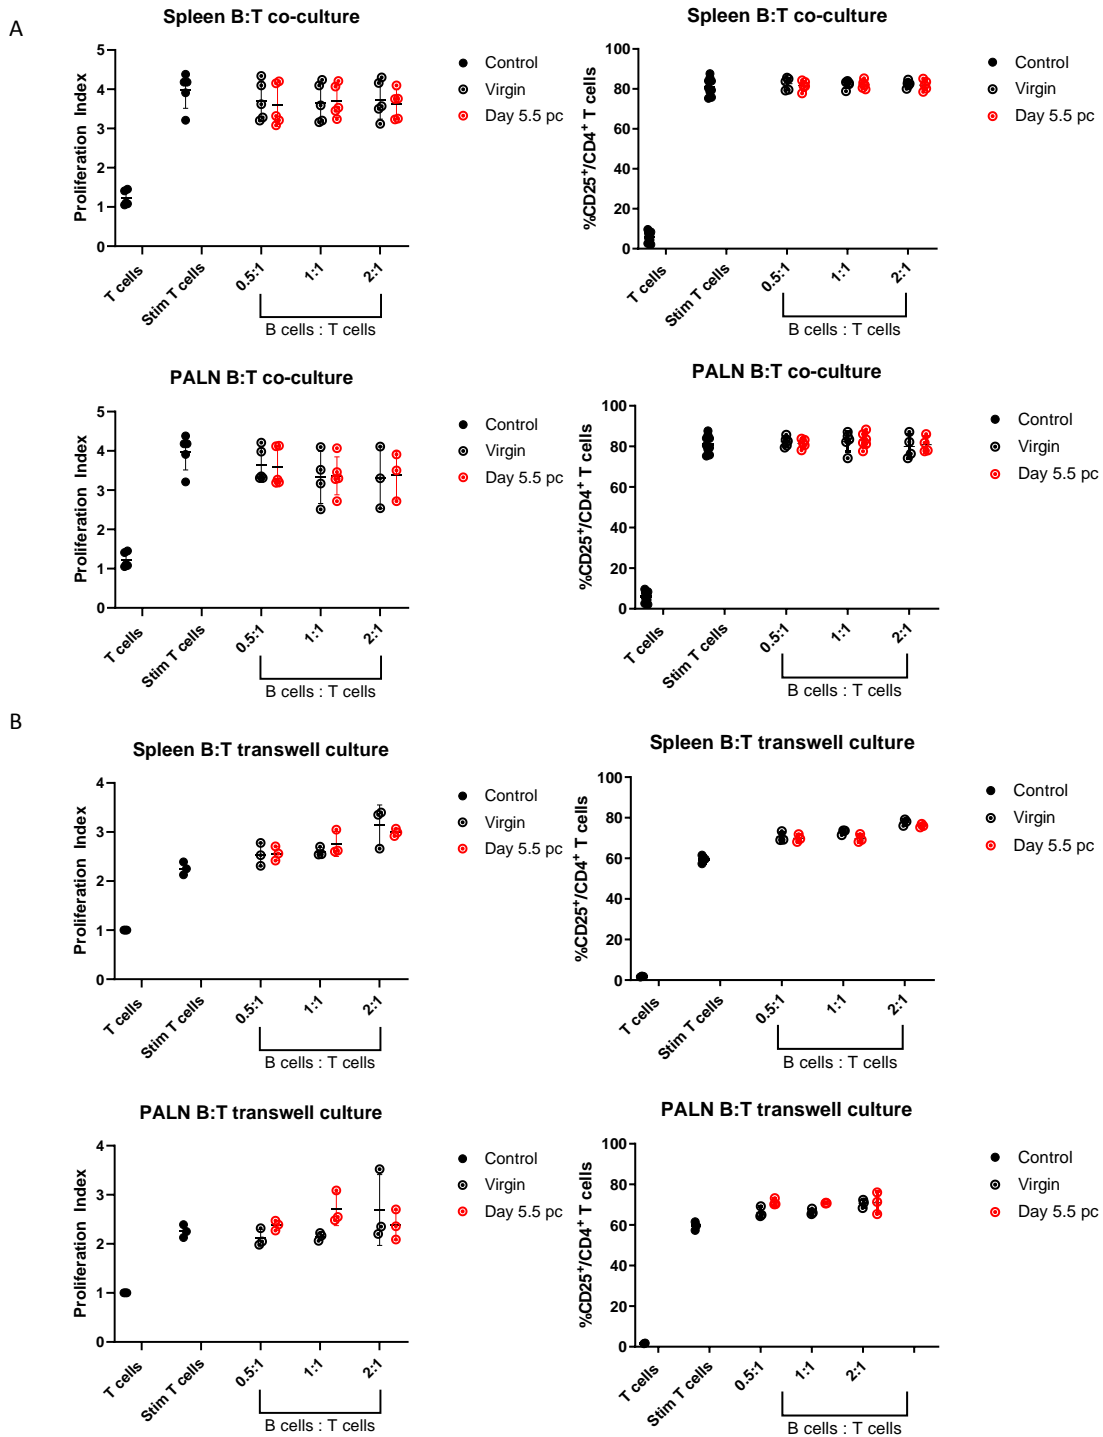

**Supplementary Figure 3.** (A) No statistical differences in proliferation indices of  $CD4^+$  T cells incubated with increasing ratios of B cells isolated from the spleen and para-aortic lymph nodes (PALN) in a co-culture ( $n=5$ ). (B) No observed differences in  $CD25^+$  activation of  $CD4^+$  T cells incubated with increasing ratios of B cells isolated from the spleen and para-aortic lymph nodes (PALN), separated physically via transwell membranes ( $n=3$ ). Data presented from three to five independent experiments and compared using one-way ANOVA.

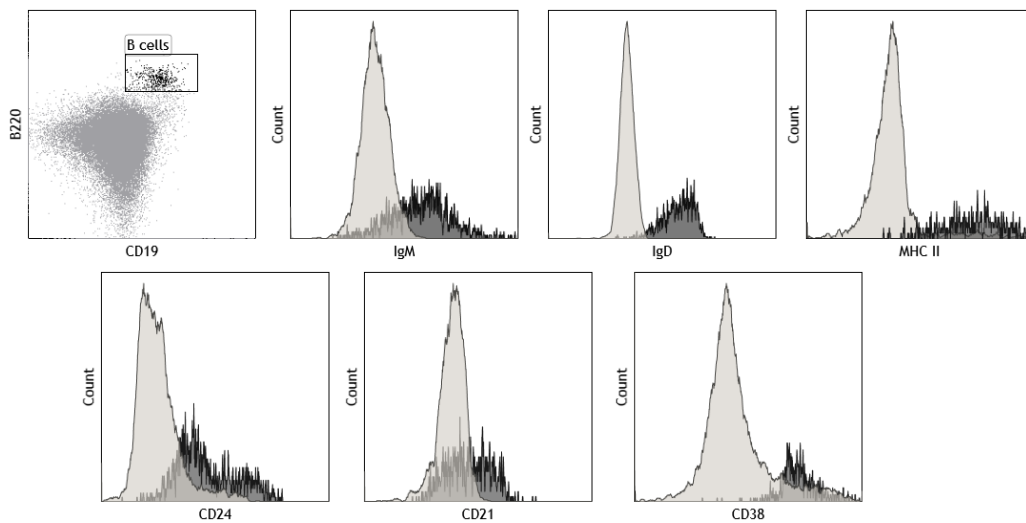

**Supplementary Figure 4.** Representative flow cytometric overlays of day 5.5 pc uterine B cells (dark grey) compared to non-B cells stained with B cell receptor markers B220, CD19, IgM, IgD, differentiation markers CD24 and CD21, and activation marker CD38. Uterine B cells exhibit high expression of these phenotypic markers compared to non-B cells. Surface marker expression was verified in three independent experiments.
